# Supplementary material
Source: Elsevier journal article supplement (https://univ-rennes.hal.science/hal-01290441v1/file/mmc1.pdf)
Supplement: mmc1 [file mmc1.pdf]

**Supporting information for**  
**Ruthenium-Catalyzed Hydroformylation of the Functional Unsaturated**  
**Fatty Nitrile 10-Undecenitrile**

Lucas Le Goanvic,<sup>[a]</sup> Jean-Luc Couturier,<sup>[b]</sup> Jean-Luc Dubois,<sup>[c]</sup> and Jean-François Carpentier<sup>[a]</sup>

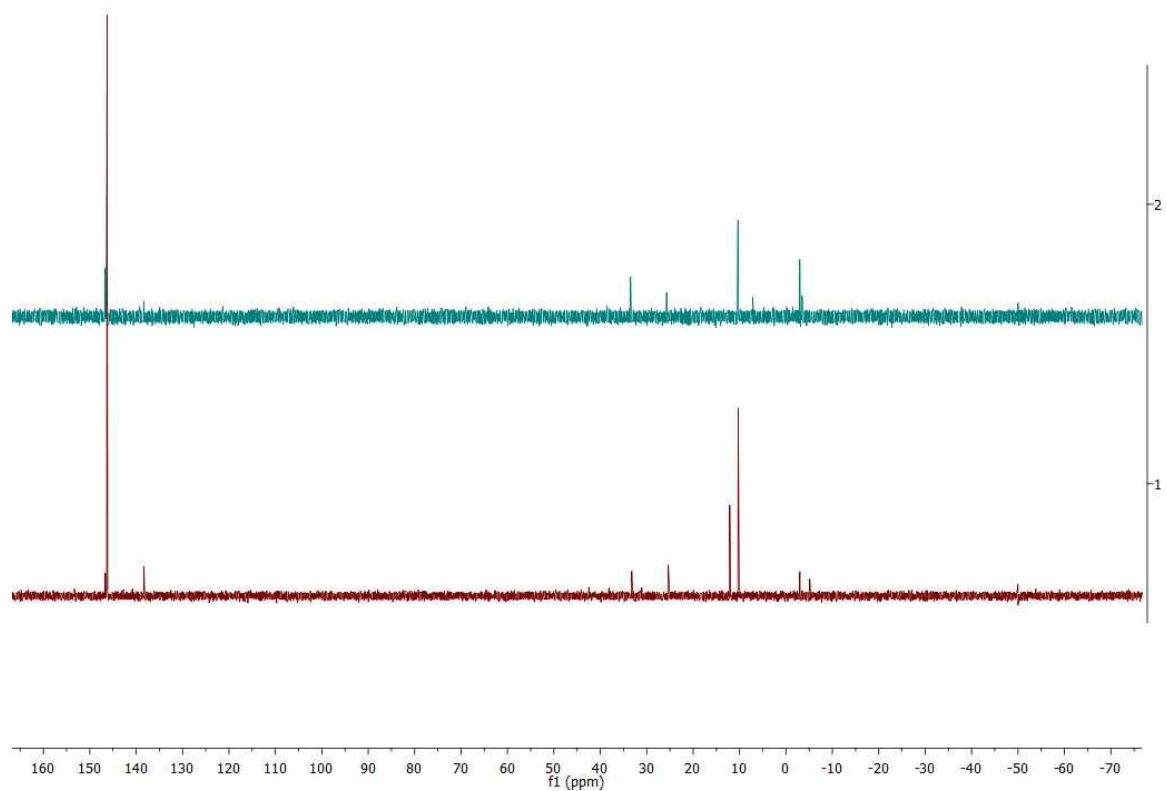

**Figure S1.**  $^{31}\text{P}\{^1\text{H}\}$  NMR spectra (160 MHz,  $\text{C}_6\text{D}_6$ , 23 °C) of reaction media (Table 1, entry 1), at = 19.5 h (*bottom*) and t = 48h (*top*). Signal of free Biphephos is observed at 146 ppm.
